# Supplementary material for: PtrMYB3, a R2R3-MYB Transcription Factor from Poncirus trifoliata, Negatively Regulates Salt Tolerance and Hydrogen Peroxide Scavenging
Source: MDPI journal article supplement (doi:10.3390/antiox10091388), 2021-08-30
Supplement: s1 [file s1]

**Table S1 Primer sequences used in this study**

| Primer names           | Purpose                               | Forward primers (5'-3')                       | Reverse primers (5'-3')                         |
|------------------------|---------------------------------------|-----------------------------------------------|-------------------------------------------------|
| <i>PtrMYB3-T</i>       | Gene cloning                          | ATGGCGGGTAAGCGCAAGAC                          | TCACCAAATCCCAAATCCG                             |
| <i>PtrMYB3-pBI121</i>  | Overexpression                        | GAGAACACGGGGGACTCTAGAA<br>TGGCGGGTAAGCGCAAGAC | ATAAGGGACTGACCACCCGGGT<br>CACCAAATCCCAAATCCG    |
| <i>PtrMYB3-101LYFP</i> | Subcellular localization              | ATGGGATCTACTAGTGAATTCAT<br>GGCGGGTAAGCGCAAGAC | GGGGGTACCGTCGACGGATCCC<br>CAAAATCCCAAATCCGATT   |
| <i>PtrMYB3-pGBKT7</i>  | Transactivation                       | ATGGCCATGGAGGCCGAATTCAT<br>GGCGGGTAAGCGCAAGAC | CCGCTGCAGGTCGACGGATCCC<br>CAAAATCCCAAATCCGATT   |
| <i>PtrMYB3-pTRV2</i>   | VIGS                                  | AGAAGGCCTCCATGGGGATCCAG<br>AAGAAACCAAAGACCAG  | TGTCTTCGGGACATGCCCGGGC<br>CAAAATCCCAAATCCGATTGC |
| 35S-F                  | Transgenic identification for tobacco | TCCTCGGATTCCATTGCCCAGC                        |                                                 |
| <i>NPT II</i>          |                                       | CGGCTATGACTGGGCACAACA                         | CGGCAGGAGCAAGGTGAGATG                           |
| <i>pTRV1</i>           | Positive identification for VIGS      | ATTGAGGCGAAGTACGATGG                          | CCATCCACAATTATTTTCCGC                           |
| <i>pTRV2-F</i>         |                                       | ATTCACTGGGAGATGATACGCT                        |                                                 |
| <i>PtrMYB3-qPCR</i>    | qPCR                                  | GAGGCACATTCCCAAAGCTG                          | TGTTTCGTCCTGGAAGTCTCC                           |
| <i>PtrPOD</i>          |                                       | ATCGCTCTTGCTGGAGACAG                          | TTCAAGGGGCATTCAGCCTC                            |
| <i>PtrMYB3-62-SK</i>   | Dual-luciferase activity assay        | CGCTCTAGAACTAGTGGATCCAT<br>GGCGGGTAAGCGCAAGAC | GATAAGCTTGATATCGAATTCTC<br>ACCAAATCCCAAATCCG    |
| <i>pPOD-0800-Luc</i>   |                                       | GTCGACGGTATCGATAAGCTTGC<br>ACGTCATGATCCATGCCA | CGCTCTAGAACTAGTGGATCCC<br>ATTTTCTGATAAGCACTTGC  |
| <i>ACTIN</i>           | Internal reference                    | CCGACCGTATGAGCAAGGAAA                         | TTCCTGTGGACAATGGATGGA                           |
| <i>Ubiquitin</i>       |                                       | GGTGTTTCCAGTGGCGGACG                          | TCCTCCCCTCAGCTACGGGGTAT                         |

(Underlines indicate enzyme site.)

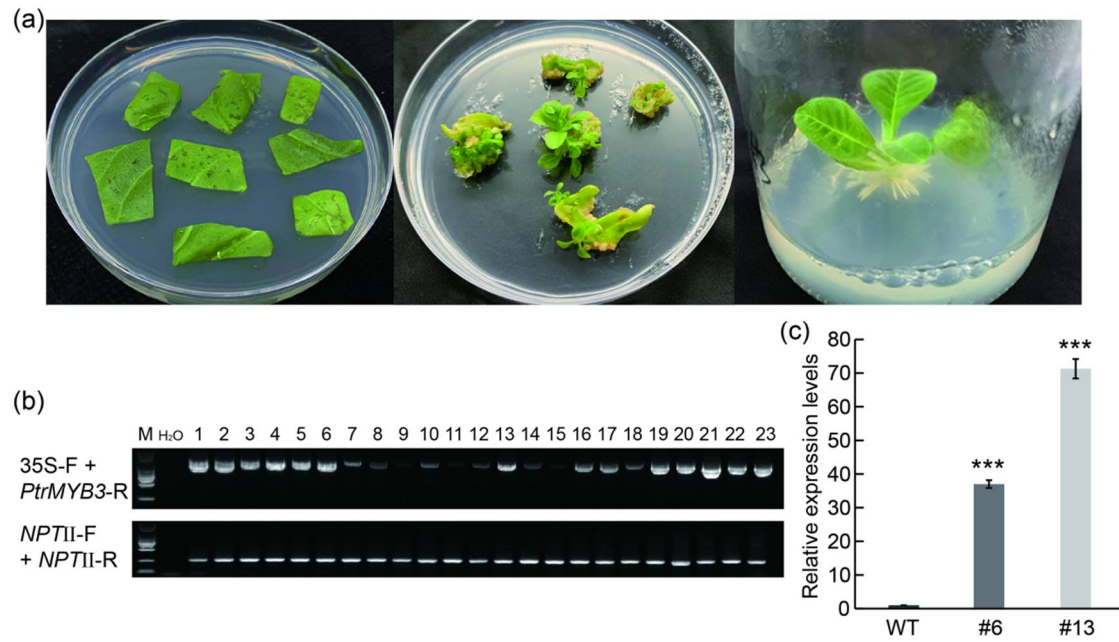

**Figure S1. Genetic transformation and molecular identification of *PtrMYB3* overexpressed tobacco plants.** (a) The representative pictures of genetic transformation. (b) The molecular identification of 23 transgenic tobacco plants using two pairs of primers. M: DNA marker. (c) The relative expression levels of *PtrMYB3* in WT and two transgenic lines (#6 and #13) measured by qPCR. Asterisks indicate significant differences between the transgenic line and WT:  $p < 0.001$  (\*\*\*)).

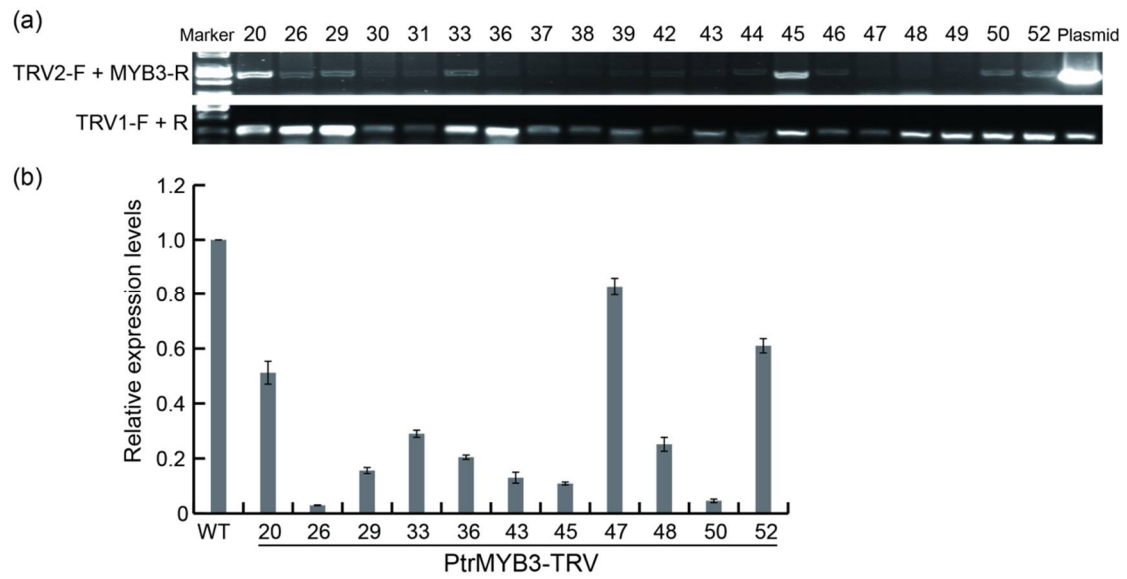

**Figure S2.** Molecular identification of *PtrMYB3*-silenced *Poncirus trifoliata* plants by genomic PCR and qPCR. (a) Genomic PCR of *PtrMYB3*-silenced plants using two pairs of primers. (b) The relative expression levels of WT and *PtrMYB3*-silenced plants (*PtrMYB3*-TRV) measured by qPCR.
